# Supplementary material
Source: PubMed Central journal article supplement (PMC8653345)
Supplement: ASE-15-5-s001.pdf [file ASE-15-5-s001.pdf]

**Supplement 1.** Assessment software utilized for anatomy education during Covid-19 (August-December, 2020).

| <b>Assessment Software (n = 141)</b>                     | <b>During Covid-19<br/>n (%)</b> |
|----------------------------------------------------------|----------------------------------|
| ExamSoft (Dallas, TX)                                    | 63 (24)                          |
| Canvas (Instructure, Salt Lake City, UT)                 | 44 (17)                          |
| Other <sup>a</sup>                                       | 44 (17)                          |
| Blackboard Learn (Blackboard Inc., Washington, D.C.)     | 20 (8)                           |
| Poll Everywhere (San Francisco, CA)                      | 18 (7)                           |
| Moodle Quiz (Moodle, Perth, Australia)                   | 15 (6)                           |
| Kahoot! (Austin, TX)                                     | 14 (5)                           |
| TurningPoint (Turning Technologies, Youngstown, OH)      | 14 (5)                           |
| Clickers                                                 | 8 (3)                            |
| Qualtrics XM (Qualtrics, Provo, UT)                      | 7 (3)                            |
| Sakai Tests & Quizzes (Sakai, Ann Arbor, MI)             | 5 (2)                            |
| ProctorU (Birmingham, AL)                                | 4 (2)                            |
| Nearpod (Miami, FL)                                      | 2 (1)                            |
| Questionmark (Questionmark Computing Ltd., Trumbull, CT) | 2 (1)                            |
| ClassMaker (Sydney, Australia)                           | 1 (0)                            |
| ExamView (Turning Technologies, Youngstown, OH)          | 1 (0)                            |
| <b>Total</b>                                             | <b>262 (100)</b>                 |

Respondents were able to indicate more than one software or tool.

<sup>a</sup>Other assessment tools included in-house platform (n = 9), Brightspace D2L (n = 5), Mastering A&P (n = 3), AllofE (n = 2), Learning Catalytics (n = 2), MS Forms (n = 2), NBME Customized Exam (n = 2), Not Sure/TBD (n = 2), Proctorio (n = 2), Respondus Monitor (n = 2), TopHat (n = 2), AnatomyTOOL (n = 1), Camtasia (n = 1), e-Medley (n = 1), Encore (n = 1), Flipgrid (n = 1), Google Forms (n = 1), InteDashboard (n = 1), Mentimeter Polling (n = 1), Moodle (n = 1), Peerceptiv (n = 1), Quizlet (n = 1), Scholar-RX (n = 1), Softchalk (n = 1), SOLE (n = 1), Speedwell (n = 1), TeamUp! (n = 1), WileyPlus (n = 1), Zoom Polls (n = 1).
