# Supplementary material
Source: PubMed Central journal article supplement (PMC8653345)
Supplement: ASE-15-5-s002.pdf [file ASE-15-5-s002.pdf]

**Supplement 2.** Non-anatomy tools utilized for anatomy education during Covid-19 (August-December, 2020).

| <b>Tools (n=62)</b>              | <b>During Covid-19<br/>n (%)</b> |
|----------------------------------|----------------------------------|
| Camera                           | 24 (18)                          |
| Tripod/Camera Holding Devices    | 16 (12)                          |
| Writing Tablet/Stylus            | 12 (9)                           |
| Lights                           | 9 (7)                            |
| iPad (Apple Inc., Cupertino, CA) | 8 (6)                            |
| Phone Gimbal/Stablizer           | 8 (6)                            |
| Microphone                       | 7 (5)                            |
| 3D Scanner                       | 4 (3)                            |
| Earbuds                          | 4 (3)                            |
| Laptop                           | 4 (3)                            |
| Monitor/Screen                   | 3 (2)                            |
| Not Sure/TBD                     | 3 (2)                            |
| Recorded Videos                  | 3 (2)                            |
| Camtasia (TechSmith, Okemos, MI) | 2 (2)                            |
| Plastic Models                   | 2 (2)                            |
| SD Memory Card                   | 2 (2)                            |
| Whiteboard                       | 2 (2)                            |
| 3D Modeling Software             | 1 (1)                            |
| Articular Storyline              | 1 (1)                            |
| Book                             | 1 (1)                            |
| Cellphone                        | 1 (1)                            |
| Flipgrid                         | 1 (1)                            |
| High Speed Internet              | 1 (1)                            |
| InteDashboard                    | 1 (1)                            |
| Miro                             | 1 (1)                            |
| Mobile Apps                      | 1 (1)                            |
| Panopto                          | 1 (1)                            |
| PDFs/Slides                      | 1 (1)                            |
| Poll Everywhere                  | 1 (1)                            |

**Title: An Analysis of Anatomy Education Before and During COVID-19: August-December 2020**

|                        |                  |
|------------------------|------------------|
| Primal TV              | 1 (1)            |
| Router                 | 1 (1)            |
| Sanitizing Wipes       | 1 (1)            |
| Separation Panels      | 1 (1)            |
| Skeleton               | 1 (1)            |
| Sketchfab              | 1 (1)            |
| Video Editing Software | 1 (1)            |
| Website                | 1 (1)            |
| <i>Total</i>           | <i>133 (100)</i> |

Respondents were able to indicate more than one software or tool.
