# Supplementary material
Source: PubMed Central journal article supplement (PMC8653345)
Supplement: ASE-15-5-s003.pdf [file ASE-15-5-s003.pdf]

**Supplement 3.** Video Conferencing Tools utilized for anatomy education during Covid-19 (August-December, 2020).

| <b>Video Conferencing Tools (n=148)</b>                    | <b>During Covid-19<br/>n (%)</b> |
|------------------------------------------------------------|----------------------------------|
| Zoom (Zoom Video Communications Inc., San Jose, CA)        | 114 (55)                         |
| Blackboard Collaborate (Blackboard Inc., Washington, D.C.) | 23 (11)                          |
| Microsoft Teams (Microsoft Corp., Redmond, WA)             | 20 (10)                          |
| Other <sup>a</sup>                                         | 18 (9)                           |
| Webex (Cisco Systems, Milpitas, CA)                        | 15 (7)                           |
| Google Meet (Hangouts) (Mountain View, CA)                 | 10 (5)                           |
| YuJa (YuJa Inc., San Jose, CA)                             | 4 (2)                            |
| Skype (Skype Ltd., Palo Alto, CA)                          | 2 (1)                            |
| <i>Total</i>                                               | <i>206 (100)</i>                 |

Respondents were able to indicate more than one software or tool. <sup>a</sup>Other assessment tools included Panopto (n = 3), Unknown (n = 3), Big Blue Button (n = 2), D2L (n = 2), None (n = 2), Bongo (n = 1), Flipgrid (n = 1), Kaltura (n = 1), Moodle (n = 1), Sakai (n = 1), Youtube (n = 1).
